# Supplementary material for: Transition to a Sustainable Circular Plastics Economy in The Netherlands: Discourse and Policy Analysis
Source: MDPI journal article supplement (doi:10.3390/su14010190), 2021-12-24
Supplement: s1 [file s1]

## Supplementary Materials

### **A: Newspaper Articles**

1. Hugo Bellaart. (26 februari 2019 dinsdag). Plastic afval maakt stinkende wonden. NRC Handelsblad. Retrieved from <https://advance-lexis-com.proxy.library.uu.nl/api/document?collection=news&id=urn:contentItem:5VHD-4Y31-DYMH-R0T9-00000-00&context=1516831>.
2. Pieter Hotse Smit / vk. (16 januari 2018 dinsdag). Kringlooeconomie komt op gang. Nederlands Dagblad. Retrieved from <https://advance-lexis-com.proxy.library.uu.nl/api/document?collection=news&id=urn:contentItem:5RDN-H8M1-JBKF-M3PK-00000-00&context=1516831>.
3. Marcel aan de Brugh, Daniël Niessen. (24 February 2018). De lange weg van plastic prut naar krat en bloembak. NRC Handelsblad. Retrieved from <https://advance-lexis-com.proxy.library.uu.nl/api/document?collection=news&id=urn:contentItem:5RR3-0NY1-DYMH-R03H-00000-00&context=1516831>.
4. ESTHER BIJLO, REDACTIE DUURZAAMHEID & NATUUR. (6 november 2019 woensdag). CPB: Statiegeld en exportverbod plastic komen recycelen ten goede. Trouw. Retrieved from <https://advance-lexis-com.proxy.library.uu.nl/api/document?collection=news&id=urn:contentItem:5XF8-TMJ1-DYRY-X164-00000-00&context=1516831>.
5. JENDA TERPSTRA, REDACTIE ECONOMIE. (4 oktober 2016 dinsdag). Bij recycelen moet de kop dringend praten met de staart. Trouw. Retrieved from <https://advance-lexis-com.proxy.library.uu.nl/api/document?collection=news&id=urn:contentItem:5KVN-GSX1-JC8X-61VV-00000-00&context=1516831>.
6. ESTHER BIJLO. (6 november 2017 maandag). De circulaire economie bloeit nog niet. Trouw. Retrieved from <https://advance-lexis-com.proxy.library.uu.nl/api/document?collection=news&id=urn:contentItem:5PWM-3HY1-JC8X-6487-00000-00&context=1516831>.
7. (06 March 2018). Voer statiegeld in voor PET-flessen en blikjes. NRC Handelsblad. Retrieved from <https://advance-lexis-com.proxy.library.uu.nl/api/document?collection=news&id=urn:contentItem:5RT8-H161-JC5G-13K4-00000-00&context=1516831>.
8. (11 december 2019 woensdag). We kunnen epidemie stoppen. de Volkskrant. Retrieved from <https://advance-lexis-com.proxy.library.uu.nl/api/document?collection=news&id=urn:contentItem:5XPR-T4R1-DYRY-X03F-00000-00&context=1516831>.
9. TCHARLOT VERLOUW. (19 juli 2018 donderdag). Circulaire economie, maar hoe dan?. Trouw. Retrieved from <https://advance-lexis-com.proxy.library.uu.nl/api/document?collection=news&id=urn:contentItem:5STX-FV81-DYRY-X3JW-00000-00&context=1516831>.
10. ESTHER BIJLO. (11 januari 2019 vrijdag). De circulaire economie is al groter dan gedacht. Trouw. Retrieved from <https://advance-lexis-com.proxy.library.uu.nl/api/document?collection=news&id=urn:contentItem:5V5H-HTB1-JC8X-610G-00000-00&context=1516831>.
11. Hans Verbraeken. (28 februari 2018 woensdag). 'Ons plastic is even goed als plastic uit olie'. Het Financieele Dagblad. Retrieved from <https://advance-lexis-com.proxy.library.uu.nl/api/document?collection=news&id=urn:contentItem:5RRX-MVM1-DYWB-S2DT-00000-00&context=1516831>.
12. NAÏM DERBALI, REDACTIE BINNENLAND. (12 september 2018 woensdag). Hoe groen is een fietspad van plastic?. Trouw. Retrieved from <https://advance-lexis-com.proxy.library.uu.nl/api/document?collection=news&id=urn:contentItem:5T7M-VW21-DYRY-X0T2-00000-00&context=1516831>.
13. Hella Hueck. (4 december 2018 dinsdag). Lego-blokje blijft nog lang van plastic. Het Financieele Dagblad. Retrieved from <https://advance-lexis-com.proxy.library.uu.nl/api/document?collection=news&id=urn:contentItem:5TWD-VB71-JCD9-210G-00000-00&context=1516831>.
14. ESTHER BIJLO. (19 januari 2019 zaterdag). Het moet met minder plastic. Trouw. Retrieved from <https://advance-lexis-com.proxy.library.uu.nl/api/document?collection=news&id=urn:contentItem:5V77-9FM1-DYRY-X0SC-00000-00&context=1516831>.

15. Petra Noordhuis. (16 juli 2019 dinsdag). Banken verdienen geld aan plastic. Nederlands Dagblad. Retrieved from <https://advance-lexis-com.proxy.library.uu.nl/api/document?collection=news&id=urn:contentItem:5WK3-SPY1-JBKF-M00J-00000-00&context=1516831>.
16. JOEP ENGELS & MAAIKE VAN HOUTEN. (21 september 2017 donderdag). CPB: thuis gewoon doorgaan met scheiden van plastic. Trouw. Retrieved from <https://advance-lexis-com.proxy.library.uu.nl/api/document?collection=news&id=urn:contentItem:5PHR-7N51-DYRY-X1KP-00000-00&context=1516831>.
17. Michael Persson. (14 oktober 2011 vrijdag). 'We moeten grondstoffen zo oneindig mogelijk gebruiken'; interview marga hoeK, directeur de Groene Zaak. de Volkskrant. Retrieved from <https://advance-lexis-com.proxy.library.uu.nl/api/document?collection=news&id=urn:contentItem:5418-RBM1-DYRY-N24D-00000-00&context=1516831>.
18. (30 september 2017 zaterdag). plastic fantastic. Het Financieele Dagblad. Retrieved from <https://advance-lexis-com.proxy.library.uu.nl/api/document?collection=news&id=urn:contentItem:5PKS-5KC1-JCD9-209C-00000-00&context=1516831>.
19. (4 april 2017 dinsdag). Bioplastic geen oplossing voor plastic soep. Nederlands Dagblad. Retrieved from <https://advance-lexis-com.proxy.library.uu.nl/api/document?collection=news&id=urn:contentItem:5N7F-RJV1-DYRY-N01K-00000-00&context=1516831>.
20. Hans Verbraeken. (10 januari 2017 dinsdag). De plasticroute: van cellofaantje om de haring tot bermhaal. Het Financieele Dagblad. Retrieved from <https://advance-lexis-com.proxy.library.uu.nl/api/document?collection=news&id=urn:contentItem:5MKM-PTH1-JCD9-21NM-00000-00&context=1516831>.
21. Hans Verbraeken. (28 december 2018 vrijdag). Recyclingsector groeit dankzij afvalstop China. Het Financieele Dagblad. Retrieved from <https://advance-lexis-com.proxy.library.uu.nl/api/document?collection=news&id=urn:contentItem:5V2J-4RB1-DYWB-S09R-00000-00&context=1516831>.
22. GERARD REIJN. (20 mei 2019 maandag). Luiheid dreigt bij verduurzamers. de Volkskrant. Retrieved from <https://advance-lexis-com.proxy.library.uu.nl/api/document?collection=news&id=urn:contentItem:5W4Y-IVX1-JC8X-603H-00000-00&context=1516831>.
23. (25 januari 2016 maandag). 'Meer plastic dan vis in de oceanen in 2050'; nrc.checkt. NRC Handelsblad. Retrieved from <https://advance-lexis-com.proxy.library.uu.nl/api/document?collection=news&id=urn:contentItem:5HXW-0J11-JC8W-Y471-00000-00&context=1516831>.
24. (19 december 2017 dinsdag). Europees akkoord over terugdringen van afvalberg. Trouw. Retrieved from <https://advance-lexis-com.proxy.library.uu.nl/api/document?collection=news&id=urn:contentItem:5R6S-VDV1-DYRY-X373-00000-00&context=1516831>.
25. Hans Verbraeken. (3 oktober 2016 maandag). Kunststofindustrie roept op tot andere aanpak bij recycling. Het Financieele Dagblad. Retrieved from <https://advance-lexis-com.proxy.library.uu.nl/api/document?collection=news&id=urn:contentItem:5KVF-D1P1-JCD9-223H-00000-00&context=1516831>.
26. HANS NAUTA. (17 januari 2018 woensdag). China wil ons afval niet meer en dat biedt kansen. Trouw. Retrieved from <https://advance-lexis-com.proxy.library.uu.nl/api/document?collection=news&id=urn:contentItem:5RF0-0T71-DYRY-X0MG-00000-00&context=1516831>.
27. Gerard Reijn / vk. (30 november 2017 donderdag). Statiegeld op kleine flesjes en blikjes lijkt nabij. Nederlands Dagblad. Retrieved from <https://advance-lexis-com.proxy.library.uu.nl/api/document?collection=news&id=urn:contentItem:5R2M-YR91-JBKF-M4SN-00000-00&context=1516831>.
28. Petra Noordhuis beeld Rufus de Vries, Stichting Klean. (21 maart 2015 zaterdag). raap elke dag een stuk zwerfvuil op Succesvolle statiegeldregeling in de prullenbak . Nederlands Dagblad. Retrieved from <https://advance-lexis-com.proxy.library.uu.nl/api/document?collection=news&id=urn:contentItem:5FJP-9RM1-JC8W-Y1WD-00000-00&context=1516831>.
29. CHARLOT VERLOUW. (17 oktober 2018 woensdag). Op weg naar het ultieme keurmerk. Trouw. Retrieved from <https://advance-lexis-com.proxy.library.uu.nl/api/document?collection=news&id=urn:contentItem:5TH3-VBB1-DYRY-X35F-00000-00&context=1516831>.

30. RENÉ DIDDE. (4 januari 2018 donderdag). Friesland pakt uit in de strijd tegen verspilling. de Volkskrant. Retrieved from <https://advance-lexis-com.proxy.library.uu.nl/api/document?collection=news&id=urn:contentItem:5RB6-C9X1-JC8X-63NW-00000-00&context=1516831>.
31. Warna Oosterbaan Foto Thomas Nondh Jansen. (12 oktober 2019 zaterdag). Maken, maken, niet kopen; En nu?; Repareer! Is het kapot? Maak het gewoon weer ; Geen idee hoe we onze spullen kunnen repareren. NRC Handelsblad. Retrieved from <https://advance-lexis-com.proxy.library.uu.nl/api/document?collection=news&id=urn:contentItem:5X7Y-XH51-JC5G-1000-00000-00&context=1516831>.
32. ESTHER BIJLO, REDACTIE DUURZAAMHEID EN NATUUR. (25 januari 2017 woensdag). Grondstoffenakkoord met bedrijfsleven is rond. Trouw. Retrieved from <https://advance-lexis-com.proxy.library.uu.nl/api/document?collection=news&id=urn:contentItem:5MPV-RF71-JC8X-63SG-00000-00&context=1516831>.
33. ESTHER BIJLO. (15 mei 2017 maandag). Circulair ben je niet zomaar als bedrijf. Trouw. Retrieved from <https://advance-lexis-com.proxy.library.uu.nl/api/document?collection=news&id=urn:contentItem:5NJ7-0R51-JC8X-60H1-00000-00&context=1516831>.
34. Tekst Hans Marijnissen. (13 juni 2014 vrijdag). Van deze fles maakt Lidl een nieuwe . Trouw. Retrieved from <https://advance-lexis-com.proxy.library.uu.nl/api/document?collection=news&id=urn:contentItem:5CDS-71H1-JC8W-Y0RC-00000-00&context=1516831>.
35. JOOP BOUMA, REDACTIE DUURZAAMHEID & NATUUR. (28 september 2019 zaterdag). Uitstel heeft geen zin: alleen statiegeld helpt tegen zwerfafval. Trouw. Retrieved from <https://advance-lexis-com.proxy.library.uu.nl/api/document?collection=news&id=urn:contentItem:5X50-8MR1-JC8X-605N-00000-00&context=1516831>.
36. YASEMIN CEGEREK, WAS PVDA-TWEEDE KAMERLID EN PARLEMENTAIR RAPPORTEUR CIRCULAIRE ECONOMIE. (21 augustus 2017 maandag). Zet een prijs op alle verpakkingen. Trouw. Retrieved from <https://advance-lexis-com.proxy.library.uu.nl/api/document?collection=news&id=urn:contentItem:5P94-4S91-DYRY-X3M5-00000-00&context=1516831>.
37. anp. (17 januari 2018 woensdag). Strategie Brussel tegen plasticafval. Nederlands Dagblad. Retrieved from <https://advance-lexis-com.proxy.library.uu.nl/api/document?collection=news&id=urn:contentItem:5RDW-HHY1-DY2H-B1RK-00000-00&context=1516831>.
38. Door onze redacteur Barbara Rijlaarsdam. (17 december 2015 donderdag). Groene bazen willen inspireren. NRC Handelsblad. Retrieved from <https://advance-lexis-com.proxy.library.uu.nl/api/document?collection=news&id=urn:contentItem:5HMI-4751-JC8W-Y417-00000-00&context=1516831>.
39. VAN ONZE VERSLAGGEVER GERARD REIJN. (14 september 2016 woensdag). 'Weg met onze wegwerpmentaliteit'. de Volkskrant. Retrieved from <https://advance-lexis-com.proxy.library.uu.nl/api/document?collection=news&id=urn:contentItem:5KPD-36R1-DYRY-X435-00000-00&context=1516831>.
40. (7 januari 2017 zaterdag). ' Waarschijnlijk eindigen we boven de 3 graden Celsius'. Het Financieel Dagblad. Retrieved from <https://advance-lexis-com.proxy.library.uu.nl/api/document?collection=news&id=urn:contentItem:5MK0-T6H1-DYWB-S0WJ-00000-00&context=1516831>.
41. (15 december 2017 vrijdag). Zonder statiegeld lost Nederland de vervuiling door zwerfafval niet op. Het Financieel Dagblad. Retrieved from <https://advance-lexis-com.proxy.library.uu.nl/api/document?collection=news&id=urn:contentItem:5R5X-V2C1-DYWB-S211-00000-00&context=1516831>.
42. (1 mei 2010 zaterdag). Stef Kranendijk, alias Mister Desso. Het Financieel Dagblad. Retrieved from <https://advance-lexis-com.proxy.library.uu.nl/api/document?collection=news&id=urn:contentItem:7YC0-P0D1-2R54-T01N-00000-00&context=1516831>.

## B: Identified Stakeholders in the Dutch Plastic Sector

| Organization                                                                                                                                                                                                                          | Actor         | Type        | #<br>Mentioned<br>in News | National<br>Agreement<br>on CE | Plastic<br>Pact |
|---------------------------------------------------------------------------------------------------------------------------------------------------------------------------------------------------------------------------------------|---------------|-------------|---------------------------|--------------------------------|-----------------|
| 4PET Recycling                                                                                                                                                                                                                        | Market        | Business    | 3                         | yes                            | yes             |
| ABN Amro                                                                                                                                                                                                                              | Market        | Business    | 2                         | yes                            | yes             |
| Aterro                                                                                                                                                                                                                                | Market        | Business    | 3                         | yes                            | yes             |
| Coöperatie Green Events Nederland                                                                                                                                                                                                     | Market        | Business    |                           | yes                            | yes             |
| Friesland Campina Nederland B.V.                                                                                                                                                                                                      | Market        | Business    |                           | yes                            | yes             |
| Ioniqa Technologies B.V.                                                                                                                                                                                                              | Market        | Business    | 2                         | yes                            | yes             |
| Philips                                                                                                                                                                                                                               | Market        | Business    | 4                         | yes                            | yes             |
| Quality Circular Polymers (QCP)                                                                                                                                                                                                       | Market        | Business    | 2                         | yes                            | yes             |
| SUEZ Recycling & Recovery Netherlands                                                                                                                                                                                                 | Market        | Business    | 2                         | yes                            | yes             |
| Unilever                                                                                                                                                                                                                              | Market        | Business    | 5                         | yes                            | yes             |
| Veolia Polymers                                                                                                                                                                                                                       | Market        | Business    | 2                         | yes                            | yes             |
| Vereniging Afvalbedrijven                                                                                                                                                                                                             | Market        | Association | 1                         | yes                            | yes             |
| A New Zero                                                                                                                                                                                                                            | Market        | Consultancy |                           | yes                            | yes             |
| TNO                                                                                                                                                                                                                                   | Market        | Consultancy | 2                         | yes                            | yes             |
| Foundation Natuur & Milieu (Nature & Environment Foundation)                                                                                                                                                                          | Civil Society | Foundation  |                           | yes                            | yes             |
| Foundation MVO Nederland                                                                                                                                                                                                              | Civil Society | Foundation  |                           | yes                            | yes             |
| Foundation Polymer Science Park                                                                                                                                                                                                       | Civil Society | Foundation  |                           | yes                            | yes             |
| Plastic Whale                                                                                                                                                                                                                         | Civil Society | NGO         |                           | yes                            | yes             |
| National Government (Minister for the Environment and the Minister of Economic Affairs, also on behalf of the Minister for Housing and the Central Government Sector, and the Minister for Foreign Trade and Development Cooperation) | State         | National    | 22                        | yes                            | yes             |
| AEB Amsterdam                                                                                                                                                                                                                         | Market        | Business    | 1                         | yes                            |                 |
| Afvalzorg                                                                                                                                                                                                                             | Market        | Business    |                           | yes                            |                 |
| AkzoNobel                                                                                                                                                                                                                             | Market        | Business    |                           | yes                            |                 |
| Boskalis                                                                                                                                                                                                                              | Market        | Business    | 1                         | yes                            |                 |
| GreenWavePlastics                                                                                                                                                                                                                     | Market        | Business    |                           | yes                            |                 |

|                                                                                  |        |                       |   |     |  |
|----------------------------------------------------------------------------------|--------|-----------------------|---|-----|--|
| Interface                                                                        | Market | Business              | 1 | yes |  |
| KplusV                                                                           | Market | Business              |   | yes |  |
| MKB Nederland (representing small and medium-sized enterprises)                  | Market | Business              | 1 | yes |  |
| Natural Plastics                                                                 | Market | Business              |   | yes |  |
| Packaging & Distribution Innovators BV                                           | Market | Business              |   | yes |  |
| RoyalhaskoningDHV                                                                | Market | Business              | 1 | yes |  |
| Triodos Bank                                                                     | Market | Business              | 1 | yes |  |
| UNIK (Unie Nederlandse Industriële Kunststofbewerders)                           | Market | Business              |   | yes |  |
| Van Gansewinkel Groep                                                            | Market | Business              |   | yes |  |
| Van Werven Plastic Recycling                                                     | Market | Business              | 1 | yes |  |
| Vita Plastics                                                                    | Market | Business              |   | yes |  |
| Vereniging Circulair Friesland                                                   | Market | Association           | 2 | yes |  |
| Afvalfonds Verpakkingen                                                          | Market | Branch organisation   | 3 | yes |  |
| Commissie Toezicht Monitoring Verpakkingen (= Afvalfonds Verpakkingen)           | Market | Branch organisation   | 1 | yes |  |
| CE Delft                                                                         | Market | Consultancy           | 3 | yes |  |
| Kennisinstituut Duurzaam Verpakken                                               | Market | Consultancy           | 5 | yes |  |
| Nationaal Duurzaamheid Instituut                                                 | Market | Consultancy           | 1 | yes |  |
| VNO-NCW (Confederation of Netherlands Industry and Employers)                    | Market | Employee organisation | 1 | yes |  |
| Stichting Nedvang                                                                | Market | Foundation            | 1 | yes |  |
| IPO, Interprovinciaal Overleg (Association of Provincial Authorities)            | State  | Association           |   | yes |  |
| Unie van Waterschappen (Association of Dutch Regional Water Authorities)         | State  | Association           |   | yes |  |
| Vereniging van Nederlandse Gemeenten (Association of Netherlands Municipalities) | State  | Association           | 2 | yes |  |
| Province Drenthe                                                                 | State  | Province              |   | yes |  |
| Province Flevoland                                                               | State  | Province              |   | yes |  |
| Province Fryslân                                                                 | State  | Province              |   | yes |  |

|                                                                                                |               |                     |   |     |     |
|------------------------------------------------------------------------------------------------|---------------|---------------------|---|-----|-----|
| Province Gelderland                                                                            | State         | Province            |   | yes |     |
| Province Groningen                                                                             | State         | Province            |   | yes |     |
| Province Noord-Brabant                                                                         | State         | Province            |   | yes |     |
| Province Overijssel                                                                            | State         | Province            | 1 | yes |     |
| Province Utrecht                                                                               | State         | Province            |   | yes |     |
| Province Zeeland                                                                               | State         | Province            |   | yes |     |
| Province Zuid-Holland                                                                          | State         | Province            |   | yes |     |
| WasteFreeOceansFoundation                                                                      | Civil Society | Association         |   | yes |     |
| Milieu Centraal                                                                                | Civil Society | Foundation          | 1 | yes |     |
| Plastic Soup Foundation                                                                        | Civil Society | Foundation          | 4 | yes |     |
| Technische Universiteit Delft                                                                  | Civil Society | Knowledge/Education | 3 | yes |     |
| Universiteit Utrecht                                                                           | Civil Society | Knowledge/Education | 2 | yes |     |
| Dutch Federation of Trade Unions                                                               | Civil Society | Trade Union         |   | yes |     |
| FNV                                                                                            | Civil Society | Trade Union         |   | yes |     |
| VCP, Vakcentrale voor Professionals (Trade Union Federation for highly educated professionals) | Civil Society | Trade Union         |   | yes |     |
| Afvalsturing Friesland N.V                                                                     | Market        | Business            |   |     | yes |
| Air Events                                                                                     | Market        | Business            |   |     | yes |
| Albert Heijn                                                                                   | Market        | Business            | 2 |     | yes |
| Aldi                                                                                           | Market        | Business            | 2 |     | yes |
| ASN Bank                                                                                       | Market        | Business            |   |     | yes |
| BRBS Recycling                                                                                 | Market        | Business            |   |     | yes |
| C.I.V. Superunie B.V.                                                                          | Market        | Business            |   |     | yes |
| CLICK-NL                                                                                       | Market        | Business            |   |     | yes |
| Coca Cola Nederland                                                                            | Market        | Business            | 8 |     | yes |
| Coöperatie Royal FloraHolland U.A.                                                             | Market        | Business            |   |     | yes |
| Cumapol B.V.                                                                                   | Market        | Business            |   |     | yes |
| Ekoplaza Franchise B.V.                                                                        | Market        | Business            |   |     | yes |
| Filigrade Sustainable Watermarks B.V.                                                          | Market        | Business            |   |     | yes |
| Gampet Plastics B.V.                                                                           | Market        | Business            |   |     | yes |

|                                            |        |          |   |  |     |
|--------------------------------------------|--------|----------|---|--|-----|
| Grolsch                                    | Market | Business | 1 |  | yes |
| Haval Disposables B.V.                     | Market | Business |   |  | yes |
| HEMA B.V.                                  | Market | Business |   |  | yes |
| Hordijk Smitgietverpakkingen B.V.          | Market | Business |   |  | yes |
| Hordijk Verpakkingenindustrie Zaandam B.V. | Market | Business |   |  | yes |
| HVC Group N.V.                             | Market | Business |   |  | yes |
| Inbev Nederland N.V.                       | Market | Business |   |  | yes |
| Indorama Ventures Europe B.V.              | Market | Business | 1 |  | yes |
| ISS Catering Services                      | Market | Business |   |  | yes |
| Jumbo Supermarkten B.V.                    | Market | Business |   |  | yes |
| Kunststof Recycling Van Werven             | Market | Business |   |  | yes |
| Kunststoffen Sorteer Installatie B.V.      | Market | Business |   |  | yes |
| Lidl                                       | Market | Business | 1 |  | yes |
| McDonald's                                 | Market | Business | 1 |  | yes |
| Mojo Concerts B.V.                         | Market | Business |   |  | yes |
| Morssinkhof Plastics Heerenveen B.V.       | Market | Business | 1 |  | yes |
| Nestlé                                     | Market | Business | 1 |  | yes |
| NS Groep N.V.                              | Market | Business |   |  | yes |
| NS Stations B.V.                           | Market | Business |   |  | yes |
| Obbotec B.V.                               | Market | Business |   |  | yes |
| Oerlemans Packaging                        | Market | Business |   |  | yes |
| PaCombi Group B.V.                         | Market | Business |   |  | yes |
| Pathé Theatres B.V.                        | Market | Business |   |  | yes |
| Plus Retail B.V.                           | Market | Business |   |  | yes |
| PolyStyreneLoop B.V.                       | Market | Business |   |  | yes |
| Purac Biochem BV (Corbion)                 | Market | Business |   |  | yes |
| Renewi Nederland B.V.                      | Market | Business |   |  | yes |
| Sodexo B.V.                                | Market | Business |   |  | yes |
| Starbucks                                  | Market | Business | 1 |  | yes |
| Total Corbion PLA B.V.                     | Market | Business | 1 |  | yes |

|                                                     |               |                       |   |  |     |
|-----------------------------------------------------|---------------|-----------------------|---|--|-----|
| Vomar Voordeelmarkt B.V.                            | Market        | Business              |   |  | yes |
| Vrumona B.V.                                        | Market        | Business              | 1 |  | yes |
| Wellman International Ltd.                          | Market        | Business              |   |  | yes |
| Federatie Nederlandse Rubber- en Kunststofindustrie | Market        | Association           | 3 |  | yes |
| NRK Recycling                                       | Market        | Association           |   |  | yes |
| NRK Verpakkingen                                    | Market        | Association           |   |  | yes |
| Nationaal Testcentrum Circulaire Plastics (NTCP)    | Civil Society | Foundation (research) |   |  | yes |
| Foundation Vierdaagsefeesten                        | Civil Society | Foundation            |   |  | yes |
| Foundation Holland Circular Hotspot                 | Civil Society | Foundation            |   |  | yes |
| Aegon                                               | Market        | Business              | 1 |  |     |
| Airbnb                                              | Market        | Business              | 1 |  |     |
| Alliander                                           | Market        | Business              | 1 |  |     |
| Allianz                                             | Market        | Business              | 1 |  |     |
| Avri (waste processor)                              | Market        | Business              | 1 |  |     |
| Bayards                                             | Market        | Business              | 1 |  |     |
| Be-Start                                            | Market        | Business              | 1 |  |     |
| Beter Bed                                           | Market        | Business              | 1 |  |     |
| Better Future Company                               | Market        | Business              | 1 |  |     |
| Broeckx Plastic Recycling                           | Market        | Business              | 2 |  |     |
| Bureau SLA                                          | Market        | Business              | 1 |  |     |
| Capgemini                                           | Market        | Business              | 1 |  |     |
| Caroda                                              | Market        | Business              | 1 |  |     |
| CeDo                                                | Market        | Business              | 1 |  |     |
| Chevron                                             | Market        | Business              | 1 |  |     |
| De Paauw Plastic Recycling                          | Market        | Business              | 1 |  |     |
| Deloitte                                            | Market        | Business              | 1 |  |     |
| Desso                                               | Market        | Business              | 2 |  |     |
| DowDuPont                                           | Market        | Business              | 1 |  |     |
| DSM                                                 | Market        | Business              | 1 |  |     |
| E&Y                                                 | Market        | Business              | 1 |  |     |



|                  |        |          |   |  |  |
|------------------|--------|----------|---|--|--|
| Exxon Mobil      | Market | Business | 1 |  |  |
| Fairphone        | Market | Business | 1 |  |  |
| Groene Zaak      | Market | Business | 1 |  |  |
| G-Star           | Market | Business | 1 |  |  |
| Ikea             | Market | Business | 2 |  |  |
| ING              | Market | Business | 1 |  |  |
| Kraft Heinz      | Market | Business | 1 |  |  |
| Kras Recycling   | Market | Business | 2 |  |  |
| Lego             | Market | Business | 2 |  |  |
| L'Oreal          | Market | Business | 1 |  |  |
| Nespresso        | Market | Business | 1 |  |  |
| New Marble       | Market | Business | 1 |  |  |
| NIBC             | Market | Business | 1 |  |  |
| Nike             | Market | Business | 1 |  |  |
| Omrin            | Market | Business | 2 |  |  |
| Overtreders W    | Market | Business | 1 |  |  |
| Pepsi            | Market | Business | 1 |  |  |
| PGGM             | Market | Business | 1 |  |  |
| PostNL           | Market | Business | 1 |  |  |
| Rabobank         | Market | Business | 1 |  |  |
| Red Bull         | Market | Business | 1 |  |  |
| Renault          | Market | Business | 1 |  |  |
| RetourMatras     | Market | Business | 1 |  |  |
| Sabic            | Market | Business | 1 |  |  |
| Shell            | Market | Business | 1 |  |  |
| Sita             | Market | Business | 1 |  |  |
| Spadel Nederland | Market | Business | 2 |  |  |
| Swapfiets        | Market | Business | 1 |  |  |
| Thuiswinkel.org  | Market | Business | 1 |  |  |
| Volksbank        | Market | Business | 1 |  |  |

|                                                                                                                   |               |                     |    |  |  |
|-------------------------------------------------------------------------------------------------------------------|---------------|---------------------|----|--|--|
| Walmart                                                                                                           | Market        | Business            | 1  |  |  |
| Centraal Bureau Levensmiddelenhandel                                                                              | Market        | Business            | 1  |  |  |
| Dutch Sustainable Growth Coalition (= Philips, Shell, KLM, Unilever, Heineken, DSM, AkzoNobel, Friesland Campina) | Market        | Business            | 1  |  |  |
| Federatie Nederlandse Levensmiddelen Industrie                                                                    | Market        | Association         | 1  |  |  |
| Nederlandse vereniging Frisdranken Waters en Sappen                                                               | Market        | Association         | 1  |  |  |
| Vereniging Plastics Recyclers Europe                                                                              | Market        | Association         | 1  |  |  |
| European Commission                                                                                               | State         | Supranational       | 11 |  |  |
| Verenigde Naties                                                                                                  | State         | Supranational       | 3  |  |  |
| WTO                                                                                                               | State         | Supranational       | 1  |  |  |
| City Amsterdam                                                                                                    | State         | Municipality        | 1  |  |  |
| City Groningen                                                                                                    | State         | Municipality        | 1  |  |  |
| City Rotterdam                                                                                                    | State         | Municipality        | 1  |  |  |
| Grondstoffen- en Afvaldienst                                                                                      | State         | Municipality        | 1  |  |  |
| Noord-Oost Groningen                                                                                              | State         | Municipality        | 1  |  |  |
| Noord-Veluwe                                                                                                      | State         | Municipality        | 1  |  |  |
| Algemene Rekenkamer                                                                                               | State         | Agency              | 1  |  |  |
| Centraal Bureau voor Statistiek                                                                                   | State         | Agency              | 1  |  |  |
| Centraal Planbureau                                                                                               | State         | Agency              | 4  |  |  |
| Planbureau voor de Leefomgeving                                                                                   | State         | Agency              | 2  |  |  |
| Rijkswaterstaat                                                                                                   | State         | Agency              | 1  |  |  |
| Sociaal- Cultureel Planbureau                                                                                     | State         | Agency              | 1  |  |  |
| Citizen initiatives                                                                                               | Civil Society | Citizen             | 4  |  |  |
| Ellen MacArthur Foundation                                                                                        | Civil Society | Foundation          | 2  |  |  |
| Stichting Ideële Reclame                                                                                          | Civil Society | Foundation          | 1  |  |  |
| Stichting KLEAN                                                                                                   | Civil Society | Foundation          | 1  |  |  |
| Erasmus Universiteit                                                                                              | Civil Society | Knowledge/Education | 1  |  |  |
| Open Universiteit                                                                                                 | Civil Society | Knowledge/Education | 1  |  |  |
| Radboud Universiteit Nijmegen                                                                                     | Civil Society | Knowledge/Education | 1  |  |  |
| Rijksuniversiteit Groningen                                                                                       | Civil Society | Knowledge/Education | 2  |  |  |

|                                                                                                                                                       |               |                     |   |  |  |
|-------------------------------------------------------------------------------------------------------------------------------------------------------|---------------|---------------------|---|--|--|
| Universiteit Leiden                                                                                                                                   | Civil Society | Knowledge/Education | 1 |  |  |
| Universiteit Maastricht                                                                                                                               | Civil Society | Knowledge/Education | 1 |  |  |
| Universiteit Twente                                                                                                                                   | Civil Society | Knowledge/Education | 1 |  |  |
| Universiteit van Amsterdam                                                                                                                            | Civil Society | Knowledge/Education | 1 |  |  |
| Vrije Universiteit                                                                                                                                    | Civil Society | Knowledge/Education | 2 |  |  |
| Wageningen Universiteit                                                                                                                               | Civil Society | Knowledge/Education | 7 |  |  |
| Eerlijke Bank- en Verzekeringswijzer (= cooperation between Amnesty International, FNV, Milieudefensie, Oxfam Novib, PAX and World Animal Protection) | Civil Society | NGO                 | 1 |  |  |
| Greenpeace                                                                                                                                            | Civil Society | NGO                 | 2 |  |  |
| Recycling Netwerk (cooperation between environmental organizations, e.g., Greenpeace)                                                                 | Civil Society | NGO                 | 4 |  |  |
| Global Footprint Network                                                                                                                              | Civil Society | Think Tank          | 1 |  |  |
| GroenLinks                                                                                                                                            | Civil Society | Political party     | 1 |  |  |
| PVDA                                                                                                                                                  | Civil Society | Political party     | 3 |  |  |
| VVD                                                                                                                                                   | Civil Society | Political party     | 1 |  |  |
| VVD councilor Gooise Meren                                                                                                                            | Civil Society | Political party     | 1 |  |  |

### C: Interview questions

Date

Location

Name:

Organization:

Position:

### Introduction

- Presentations and explanation of CRESTING project.
- Explanation of interview's role in the research.

- Explanation of consent form, and permission for recording.

#### **Background:**

1. What is your position and role in the organization? For how long?

#### **General:**

2. From your experience working in sustainability, what do you see as the main social and ecological issues with regards to plastics?

#### **Circular economy**

3. What does the circular economy mean for you? Is it necessary? Why?
4. Many say that a circular economy can allow the decoupling of economic growth from environmental degradation, do you agree? If not, does this mean that circularity is incompatible with economic growth?

#### **From your organizational perspective**

5. What are your organization's goals for the achievement of the circular plastics economy?
6. What are your organization's activities and projects for the achievement of the circular plastics economy?
7. What obstacles and challenges does your organization face in the transition towards a 100% circular plastics economy? How to deal with them?

#### **Governance and society**

8. Do you have any role in the formulation of circular plastic economy policies at the local, national, and international level? What measures and policies do you promote? Would you like to have a stronger role?
9. Is the current plastic governance system in the Netherlands effective? Why? Why not? How can it be improved?
10. Do you think that the government should increase the involvement of civil society organizations in the construction of policies and practices for the plastic sector?
11. Are the current plastic policies of the EU effective? Why? How can they be improved?

#### **Technical issues with plastics**

12. From your experience, what specific plastics are most circular and sustainable? To what extent are these used? And which ones are the least? Why are these still used?
13. How difficult is it to use only recycled plastics? How much more expensive are they compared to virgin plastics? How to stimulate the demand for recycled plastics?

14. How difficult is it to use only recyclable plastics? How much more expensive are they compared to virgin plastics? How to stimulate the demand for recyclable plastics?
15. What are your perspectives on reusable packaging, including re-usable alternatives to plastic? How much more expensive are they compared to SUP? Are reusable options more or less sustainable than SUP?
16. What are your perspectives on bio-based plastics?
17. What are your perspectives on biodegradable plastics?
18. What are your perspectives on other alternatives to plastic (metal, cardboard, glass, etc.)?
19. What are your perspectives on chemical recycling?
20. What are your perspectives on mining for plastic waste in landfills (urban mining)?
21. What are your perspectives on CO2 plastics?
22. What are the health implications and concerns with recycled and re-usable plastic? How can they be overcome?
23. What are the main ecological and environmental impacts of recycling facilities? How can they be overcome?
24. The Netherlands is one of the largest plastic waste producers in the world. In this context, is recycling enough or should we reduce plastic consumption in general as well?
25. Can there be a future without plastics? Why?

#### **Global Perspectives**

26. How can we deal with leakage of waste plastic to the Global South? Who should be responsible?
27. How can we deal with Ocean plastics and global clean-up activities? Who should be responsible? Considering that most of the pollution comes from river deltas in the Global South, should large corporations or wealthy countries give financial help and technology transfers to help countries in the Global South?
28. What are your perspectives on open-source technologies and community-based plastics recovery and transformation structures?
29. The transition often involves heavy costs through EPR systems, etc., how can we prevent this does not disproportionately fall on the most vulnerable people?
30. Overall, do you think that the transition to a 100% circular plastics economy can be achieved by 2050 as the Dutch Government aims? Why?
31. What policy measures and mechanisms do you find important to foster this transition to Circular Plastic Economy?

#### **Take-aways**

32. What would you like to learn from this research? Do you have further questions, comments, or hints about it?
33. Who else would you recommend we interview in the context of this research? Could you please introduce us to them?

**D: Overview of Interviewees**

| #  | Sector        | Role                                                                          | Organization                                                   | Country |
|----|---------------|-------------------------------------------------------------------------------|----------------------------------------------------------------|---------|
| 1  | State         | Senior Policy Advisor                                                         | Local governments                                              | NL      |
| 2  | State         | Secretary of Plastic Pact NL                                                  | National government                                            | NL      |
| 3  | Academia      | Professor in high-tech recycling                                              | University                                                     | NL      |
| 4  | Academia      | Professor in plastic packaging                                                | University                                                     | NL      |
| 5  | Academia      | Postdoctoral researcher in plastic packaging design                           | University                                                     | NL      |
| 6  | Civil Society | Senior Program Leader CE                                                      | Environmental organization                                     | NL      |
| 7  | Civil Society | Director                                                                      | Environmental organization (international)                     | NL      |
| 8  | Civil Society | Chemical engineer                                                             | Non-governmental organization specializing in the Global South | NL      |
| 9  | Civil Society | Innovation & Solution Manager                                                 | Environmental organization                                     | NL      |
| 10 | Business      | 1) Technical Engineer<br>2) Plastic Manager                                   | Large recycling firm                                           | NL      |
| 11 | Business      | Business Development Manager                                                  | Large recycling firm                                           | NL      |
| 12 | Business      | Director                                                                      | Large recycling firm                                           | NL      |
| 13 | Business      | 1) Innovation Consultant<br>2) Director of Policy, Advice, and Public Affairs | Branch association for plastic producers                       | NL      |
| 14 | Business      | Director                                                                      | Plastic producers (International branch association)           | NL      |
| 15 | Business      | Director                                                                      | Plastic producer (Bio-based)                                   | NL      |
| 16 | Business      | Managing Director                                                             | Plastic producer (Trade association)                           | NL      |
| 17 | Business      | Sustainability Director Benelux                                               | Plastic applier (Multinational product-consumer brand)         | NL      |

|    |          |                            |                                                                     |    |
|----|----------|----------------------------|---------------------------------------------------------------------|----|
| 18 | Business | Sustainability Manager     | Plastic applier (Multinational brand owner)                         | NL |
| 19 | Business | Corporate Sustainability   | Plastic applier (Multinational retail firm)                         | NL |
| 20 | Business | Director                   | Consultancy in biotechnology                                        | NL |
| 21 | Business | Director                   | Consultancy in packaging                                            | NL |
| 22 | Business | Associate Director         | Consultancy in circular economy                                     | NL |
| 23 | Business | Consultant household waste | Consultancy in circular economy                                     | NL |
| 24 | Business | Director                   | Consultancy in circular economy, chemical recycling, and bioplastic | NL |

---



## E: Q-survey process

### Consent text

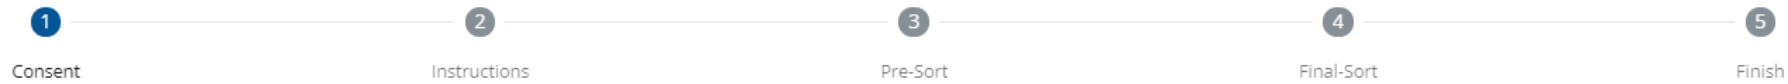

Thank you for your participation in this research conducted by Martin Calisto Friant and Dirkjan Lakerveld from Utrecht University's Copernicus Institute of Sustainable Development.

Your anonymity in this study will be assured and participation in this research is voluntary. You can decide to leave the study at any time of your choosing. The results may be reported in scientific journals, at academic conferences and policy events but will exclude any information that could reveal the identity of the participant. The results from this study will be stored in a secure password-protected domain and only the principal observer and trained researchers will have access to the material. Your personal data will not be shared with any third party outside the research team.

This research is part of the CRESTING project (<http://cresting.hull.ac.uk/>), which aims to develop cutting edge systematic analysis of circular economy-related activity and initiatives in a range of geographic and economic settings. The CRESTING project is funded by the European Union's Horizon 2020 research and innovation programme under the Marie Skłodowska-Curie grant agreement No 765198.

If you have any questions or concerns about the research, please feel to contact:

Martin Calisto Friant  
Phone: +31 636 08 7300  
E-mail: [p.m.calisto@uu.nl](mailto:p.m.calisto@uu.nl)

I DO NOT AGREE

I AGREE

### Instruction text (1)

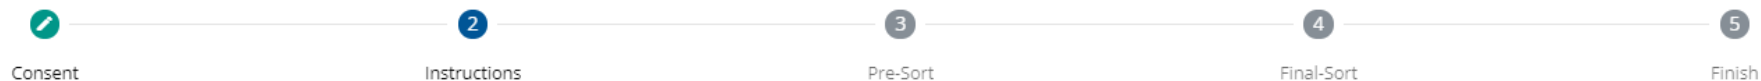

Welcome to the Utrecht University **CRESTING** project survey on the circular plastic economy.

The questionnaire consists of four steps and takes 25 to 40 minutes in total. This part of the research aims to gain insight in which action statements **you consider most and least important** for a more circular and sustainable future for plastics in the Netherlands.

Please always keep the following question in mind when ranking the statements:

**“How important do you consider the following action statements in the transition to a sustainable circular plastics economy in the Netherlands?”**

Below is a brief explanation of the steps to help you through the process.

**1. Pre-sort the statements** (+/- 5-10 minutes)

The first stage of the sorting tasks is **pre-sorting**. Read all the 42 statements first. Then, go back to the first statement, and click the icon that corresponds with your feeling, belief, or attitude about the statement. There are three choices: 'not important' (thumb-down icon), 'neutral' (question mark) and 'important' (thumb-up icon). Don't worry about making mistakes at this stage. You can change the sorting and ranking of each statement in the next step. When all the statements have been pre-sorted, you will be directed to the final sorting page.

**2. Sort and rank the statements onto the grid** (+/- 15-20 minutes)

Please drag and drop each card at the top onto the distribution grid ranging on importance from -5 (least important) to 0 (neutral) and +5 (most important). You may find all the statements important, however, please make a choice based on *your* knowledge, opinion, and belief.

Use the zoom in (+) button on the left side of the screen to enlarge the Q-grid and make the statements easier to read. Click the zoom out (-) button to view the entire grid.

You can also:

- Click the help button (the question mark on the right) to view Q Method Software's help page.
- Click the reset button to return all the statements to the three piles and start over. If you click reset, a confirmation dialogue opens. Click Yes to confirm.

## Instruction text (2)

**3. Review your Q-sort** (+/- 5-10 minutes)

When you're done placing the statements onto the distribution grid, please review your Q-sort. Drag and drop the statements to reorder them as you wish.

**4. Submit your Q-sort**

When you're happy with the Q-sort, click the Submit icon.

**5. Final Questions**

Please complete a few final questions.

Do not hesitate in sending us any questions or doubts regarding the questionnaire directly by phone or email.

Martin Calisto Friant

Phone: +31 636 08 7300

E-mail: [p.m.calisto@uu.nl](mailto:p.m.calisto@uu.nl)

START SURVEY

**Pre-sort process**

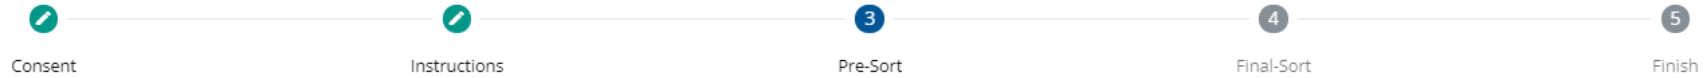

## Pre-Sort Your Responses

The first stage of the sorting tasks is **pre-sorting**. Read all the 42 statements first. Then, go back to the first statement, and click the icon that corresponds with your feeling, belief, or attitude about the statement. There are three choices: 'not important' (thumb-down icon), 'neutral' (question mark) and 'important' (thumb-up icon). Don't worry about making mistakes at this stage. You can change the sorting and ranking of each statement in the next step. When all the statements have been pre-sorted, you will be directed to the final sorting page.

START Q-SORT

|                                                                                                                                                                                          |                                                                                                                                                                                                                        |                                                                                                                                                                                                                                   |                                                                                                                                                                                                               |
|------------------------------------------------------------------------------------------------------------------------------------------------------------------------------------------|------------------------------------------------------------------------------------------------------------------------------------------------------------------------------------------------------------------------|-----------------------------------------------------------------------------------------------------------------------------------------------------------------------------------------------------------------------------------|---------------------------------------------------------------------------------------------------------------------------------------------------------------------------------------------------------------|
| <p>The government should establish a single system for waste management in all municipalities to generate efficient economies of scale for plastic recovery operations.</p> <p>👎 ? 👍</p> | <p>The media should communicate the health and environmental benefits of plastics better, especially compared to alternatives, which can have a higher environmental footprint.</p> <p>👎 ? 👍</p> <p>Most important</p> | <p>The government should establish a fund focused on innovation and R&amp;D of circular solutions (such as new sorting and recycling technologies) financed by fees on virgin materials.</p> <p>👎 ? 👍</p>                         | <p>The government should place less regulatory constraints for bio-based, biodegradable and recycled plastics, especially for food-uses.</p> <p>👎 ? 👍</p>                                                     |
| <p>The government should place targets to reduce overall plastic consumption per capita.</p> <p>👎 ? 👍</p> <p>Least important</p>                                                         | <p>The government and companies from the Global North should establish a fund to finance clean-up activities of plastics in the oceans and other natural ecosystems.</p> <p>👎 ? 👍</p>                                  | <p>The government should establish a fair and just societal system to make sure that all the fees and costs of a circular economy transition for plastics do not fall on the poorest and most vulnerable people.</p> <p>👎 ? 👍</p> | <p>Municipalities should have more autonomy in the management of their recycling systems so that small-scale plastic recovery initiatives can be created and develop disruptive innovations.</p> <p>👎 ? 👍</p> |

Etc.

Start of final Q-sort

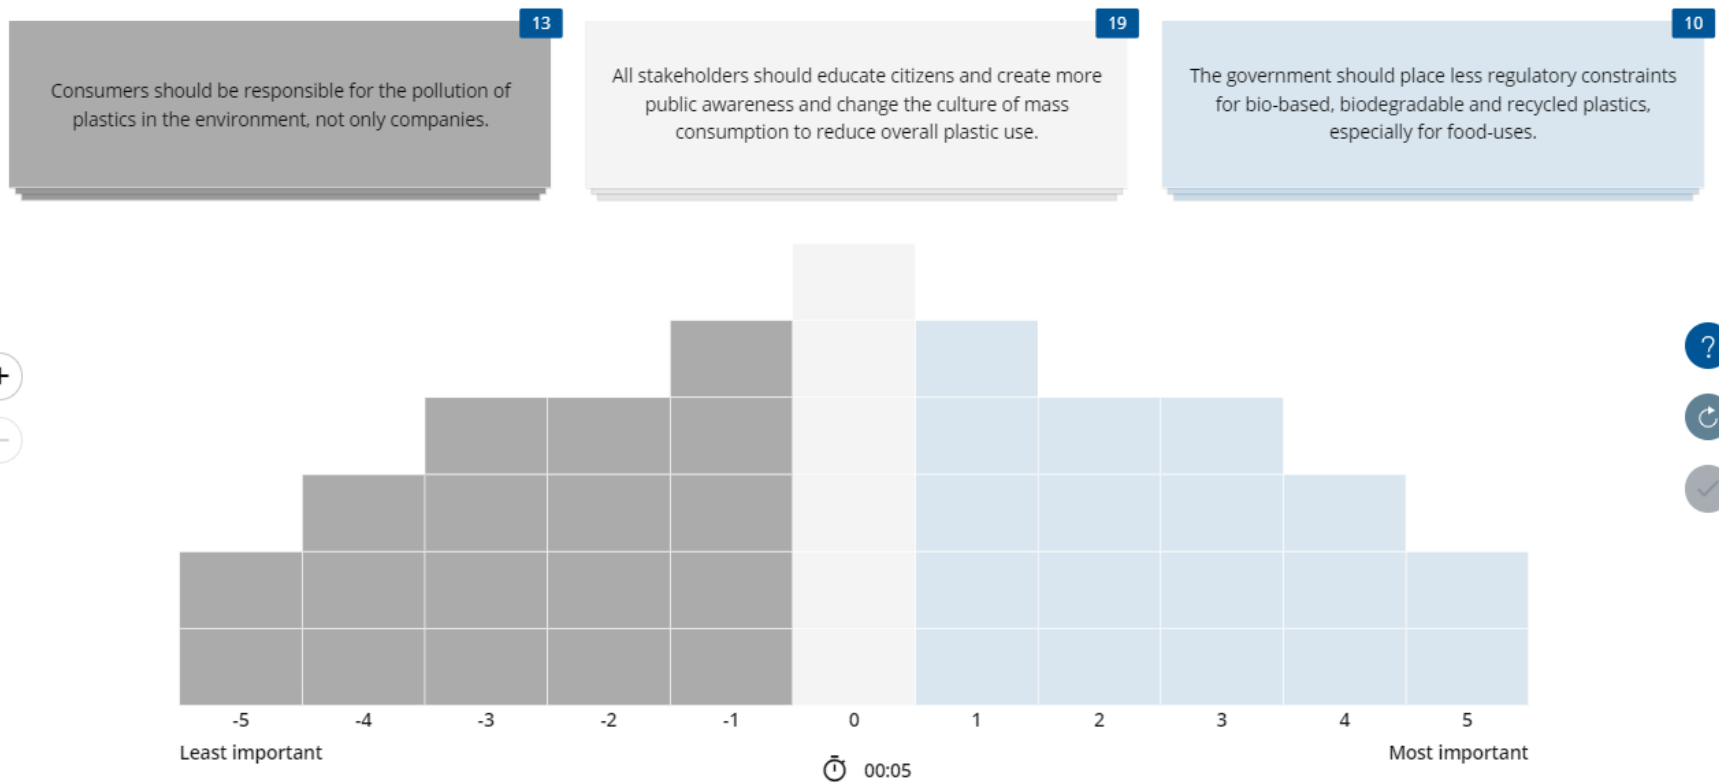

**Submit final Q-sort**  
 This Q-sort is randomly filled in and was not submitted.



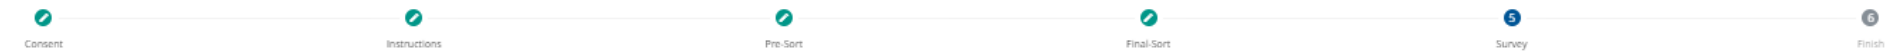

Final Questions

Please complete a few final questions.

What sector is your organisation in? \*

What organisation do you work for? \*

Do you have further comments about the research?

SUBMIT

VIEW Q-SORT

F: Full data recycling percentages Afvalfonds Verpakkingen 2014 – 2019

| Year | Brought on the market in Kton | Recycled (R7) in Kton | % Recycled (R7) | % Energy recovery (R8) | Target % recycling (R7) (EU Directive 2018/852) | Target % recycling (R7) (NL: Packaging Management Decree 2014) |
|------|-------------------------------|-----------------------|-----------------|------------------------|-------------------------------------------------|----------------------------------------------------------------|
| 2013 | 468                           | 268                   | 47%             | 53%                    | 22.5%                                           | 43%                                                            |
| 2014 | 474                           | 240                   | 51%             | 49%                    | 22.5%                                           | 44%                                                            |
| 2015 | 492                           | 245                   | 50%             | 50%                    | 22.5%                                           | 45%                                                            |
| 2016 | 505                           | 264                   | 52%             | 48%                    | 22.5%                                           | 46%                                                            |
| 2017 | 519                           | 263                   | 51%             | 49%                    | 22.5%                                           | 47%                                                            |
| 2018 | 526                           | 284                   | 54%             | 46%                    | 22.5%                                           | 48%                                                            |
| 2019 | 523                           | 299                   | 57%             | 43%                    | 22.5%                                           | 49%                                                            |
| 2025 |                               |                       |                 |                        | 55%                                             | 55%                                                            |
| 2030 |                               |                       |                 |                        | 60%                                             | 60%                                                            |

Source: Monitoring reports Afvalfonds Verpakkingen 2014, 2015, 2016, 2017, 2018, and 2019.

#### G: Output from PQ Method Software

##### Significant loadings

Significant loadings were calculated, by fulfilling two conditions: 1) EVs<sup>1</sup> > 1, and 2) at least two participants that load significantly on a certain perspective. Significance was determined by using Brown's formula (1980) (multiplying 1.96 with the standard error (which is:  $1 / \sqrt{n}$ )).

where 'n' is equal to the number of statements (i.e., 42). Therefore,  $1.96 * (1 / \sqrt{42}) = 0.302$ . therefore, participants who loaded  $\pm 0.302$  are statistically significant at  $p < 0.05$ . Significant participant loadings on a perspective are marked with an asterisk (\*) in Table A.

The grey boxes in Table A indicate perspectives to which participants belong mostly. Most participants attributed significantly to one of the perspectives. Perspective 1 consists of four people (and three confounders from perspective 3, and one negative loading), perspective 2 has four people (and one negative loading), perspective 3 includes twelve people (and one confounder from perspective 4), and perspective 4 includes four people.

- **Confounders:** In total four confounders loaded significantly on two perspectives. These are participants 4, 16, 17, and 26. Those people are considered to have hybrid views. They are appointed to the perspective where they scored the highest because this gives more meaning to the perspective. During the interpretation, it will be kept in mind that they scored also high on other perspectives.

<sup>1</sup> Eigenvalue or the sum of its squared factor loadings



- **Non-loaders:** People who did not load significantly to one of the perspectives. Only participant 23 did not load significantly, meaning that this person holds a unique point of view, which is inconsistent with other participants, and is therefore excluded from the analysis.
- **Negative loading:** Participants 6 and 21 loaded significantly in the opposite (-) direction on one of the perspectives. This means that they have a significant opposite view compared to the participants who belong to that perspective. In case of participant 21, they were not appointed to any of the perspectives and were therefore excluded from the analysis.

Table 0. (Marked with ‘\*’).

| #  | Participant | Persp. 1 | Persp. 2 | Persp. 3 | Persp. 4 | Extra information               |
|----|-------------|----------|----------|----------|----------|---------------------------------|
| 1  | CSO1        | 0.5727*  | -0.0712  | 0.2363   | 0.0543   |                                 |
| 2  | GOV1        | 0.0332   | -0.1995  | 0.6170*  | 0.1478   |                                 |
| 3  | PAO1        | 0.1050   | 0.2982   | 0.3433*  | 0.3018   |                                 |
| 4  | WMC1        | 0.1736   | 0.2940   | 0.3769*  | 0.4877*  | Confounder 4 and 3              |
| 5  | PAO2        | -0.2419  | 0.6376*  | 0.3003   | 0.0476   |                                 |
| 6  | CSO2        | 0.3695*  | -0.3871* | 0.1746   | -0.0826  | Negatively significant persp. 2 |
| 7  | RIN1        | 0.2864   | -0.0270  | 0.2912   | 0.3539*  |                                 |
| 8  | COO1        | 0.2331   | 0.0778   | 0.3672*  | 0.2290   |                                 |
| 9  | PPO1        | -0.0441  | 0.6217*  | 0.1139   | 0.0582   |                                 |
| 10 | ANO1        | 0.0551   | 0.1380   | 0.5368*  | 0.0398   |                                 |
| 11 | CSO3        | 0.2269   | 0.2983   | 0.4939*  | -0.0278  |                                 |
| 12 | WMC2        | 0.0932   | 0.5270*  | -0.0418  | 0.1706   |                                 |
| 13 | GOV2        | 0.6160*  | 0.1815   | 0.0381   | -0.0935  |                                 |
| 14 | PPO2        | 0.1698   | 0.7494*  | 0.2214   | -0.0509  |                                 |
| 15 | RIN2        | 0.6906*  | 0.0152   | 0.1073   | 0.1022   |                                 |
| 16 | WMC3        | 0.3214*  | 0.0646   | 0.5219*  | 0.2174   | Confounder 3 and 1              |
| 17 | PAO3        | 0.3144*  | 0.0757   | 0.5413*  | -0.1169  | Confounder 3 and 1              |
| 18 | COO2        | 0.1430   | 0.0181   | 0.4494*  | 0.1854   |                                 |
| 19 | WMC4        | 0.1855   | 0.2519   | 0.4939*  | -0.0254  |                                 |
| 20 | WMC5        | -0.0725  | 0.1275   | 0.5117*  | 0.0892   |                                 |
| 21 | RIN3        | -0.3649* | 0.2264   | 0.1497   | 0.2437   | Negatively significant          |
| 22 | RIN4        | 0.0183   | 0.2719   | 0.1548   | 0.5020*  |                                 |
| 23 | PPO3        | -0.1207  | -0.0203  | -0.0267  | 0.2691   | Non-loader                      |
| 24 | PPO4        | 0.0360   | 0.0162   | 0.0298   | 0.5696*  |                                 |
| 25 | GOV3        | -0.1213  | 0.0472   | 0.5158*  | 0.0182   |                                 |
| 26 | GOV4        | 0.3294*  | 0.2496   | 0.3434*  | 0.2190   | Confounder 3 and 1              |

## Z-Scores per Perspective

| #   | Themes                            | Q action statements                                                                                                                                                          | Z-Scores per perspective |          |          |          |
|-----|-----------------------------------|------------------------------------------------------------------------------------------------------------------------------------------------------------------------------|--------------------------|----------|----------|----------|
|     |                                   |                                                                                                                                                                              | Persp. 1                 | Persp. 2 | Persp. 3 | Persp. 4 |
| 1.  | Alternatives to plastic           | The government and companies should investigate and promote sustainable alternative materials to plastic.                                                                    | -0.411                   | -0.371   | -0.091   | 0.949    |
| 2.  | Ban export outside the EU         | The EU should ban the export of plastic waste outside Europe so plastic waste is recycled and processed within European borders.                                             | 1.334                    | 0.454    | 0.81     | 0.715    |
| 3.  | Benefits of plastics              | The media should communicate the health and environmental benefits of plastics better, especially compared to alternatives, which can have a higher environmental footprint. | -1.531                   | 1.382    | 0.947    | -0.19    |
| 4.  | Promote bio-based plastics        | The government and companies should encourage and highly increase the use of bio-based plastics.                                                                             | -0.589                   | -0.81    | -1.257   | 1.572    |
| 5.  | Regulate bio-based plastics       | The government should highly regulate bio-based plastic to prevent that they compete with food production and biodiversity conservation.                                     | -0.43                    | 0.594    | 0.787    | -1.761   |
| 6.  | Clean-up fund                     | The government and companies from the Global North should establish a fund to finance clean-up activities of plastics in the oceans and other natural ecosystems.            | 0.834                    | 0.499    | -1.032   | -0.856   |
| 7.  | Promote compostable plastics      | The government and companies should promote the use of compostable plastics for applications where it is suitable (e.g., tea bags, coffee capsules, cups, cutlery, etc.)     | -1.47                    | -0.661   | -0.017   | 1.951    |
| 8.  | Consumer responsibility           | Consumers should be responsible for the pollution of plastics in the environment, not only companies.                                                                        | -1.833                   | 0.849    | 0.923    | -0.097   |
| 9.  | Ban controversial fossil plastics | The government should ban plastics made from controversial sources such as tar sands and shale gas.                                                                          | -0.088                   | -1.744   | -0.596   | -0.282   |
| 10. | Deposit return system             | The government should mandate the establishment of a deposit return systems for all relevant plastics (not just large PET bottles).                                          | 1.566                    | -0.654   | 0.48     | -1.187   |

|     |                                     |                                                                                                                                                                                                                                              |        |        |        |        |
|-----|-------------------------------------|----------------------------------------------------------------------------------------------------------------------------------------------------------------------------------------------------------------------------------------------|--------|--------|--------|--------|
| 11. | Design for sustainability           | Companies should always design for recyclability and lower overall environmental impacts throughout a product's lifecycle (including resource use and hazardous substances).                                                                 | 1.272  | 1.487  | 1.84   | 0.905  |
| 12. | Discourage incineration             | The government should establish financial and legal incentives to discourage the incineration of lower grade plastics (with or without energy recovery) and promote their recycling.                                                         | 1.157  | 1.834  | 0.76   | 0.569  |
| 13. | Education and awareness             | All stakeholders should educate citizens and create more public awareness and change the culture of mass consumption to reduce overall plastic use.                                                                                          | 0.136  | -0.495 | -0.21  | 0.238  |
| 14. | Enforcement and control             | The government and companies should enforce stronger control policies to prevent mismanaged plastics (illegal dumping and exports to the Global South).                                                                                      | 0.59   | 1.002  | 0.182  | -0.238 |
| 15. | Expand EPR to other plastics        | The government should expand EPR systems to other plastics currently not covered by EPR schemes.                                                                                                                                             | 0.678  | 1.133  | 1.099  | -0.764 |
| 16. | Fair and just societal system       | The government should establish a fair and just societal system to make sure that all the fees and costs of a circular economy transition for plastics do not fall on the poorest and most vulnerable people.                                | 0.171  | 0.691  | -1.698 | 0.667  |
| 17. | Global solidarity                   | Government and companies from the Global North should provide financial assistance and technology transfers to countries in the Global South so they can better manage plastic waste, as that is where most ocean plastics come from.        | 0.849  | -0.599 | -1.038 | -0.715 |
| 18. | Health, safety, and toxicity        | Regulatory agencies should strengthen and improve the enforcement of health, safety, and hazardous substances standards (OHS and REACH) on plastic products, as well as their production process.                                            | -1.169 | -0.89  | -0.29  | 0.049  |
| 19. | EPR inclusiveness and participation | Afvalfonds Verpakkingen should include civil society organizations and local and national government representatives in a participatory and inclusive manner so that its decisions regarding plastics are more democratic and collaborative. | -0.355 | 0.242  | -1.271 | -0.049 |

|     |                                                   |                                                                                                                                                                                                                                                          |        |        |        |        |
|-----|---------------------------------------------------|----------------------------------------------------------------------------------------------------------------------------------------------------------------------------------------------------------------------------------------------------------|--------|--------|--------|--------|
| 20. | Increase EPR fees                                 | Afvalfonds Verpakkingen should increase the waste management contribution fee paid to the EPR system because the current price is too low to foster the best recovery practices.                                                                         | -0.37  | -0.668 | 0.56   | -0.38  |
| 21. | Innovation fund                                   | The government should establish a fund focused on innovation and R&D of circular solutions (such as new sorting and recycling technologies) financed by fees on virgin materials.                                                                        | 0.355  | 1.126  | -0.019 | 0.569  |
| 22. | Marketing on recyclability                        | The government and companies should ensure that claims about recyclability and composability are not misleading and deceptive.                                                                                                                           | 0.11   | 1.345  | 0.84   | 0.38   |
| 23. | Municipal autonomy                                | Municipalities should have more autonomy in the management of their recycling systems so that small-scale plastic recovery initiatives can be created and develop disruptive innovations.                                                                | -0.896 | -0.766 | -2.019 | -1.523 |
| 24. | Ban non-recyclable plastics                       | The government should ban non-recyclable single-use plastic applications until an effective collecting, sorting, and recycling infrastructure is implemented.                                                                                            | 0.896  | -1.097 | -0.027 | -0.808 |
| 25. | Open-source innovations                           | The government, companies, and civil society organizations should promote open-source technologies for plastic collection, sorting, and recycling to expand innovations throughout society.                                                              | -0.438 | 0.868  | -0.269 | -0.146 |
| 26. | Multi-stakeholder participation and collaboration | The government should increase civil society participation and multi-stakeholder cooperation along the entire value chain to improve plastic policies and practices including eco-design, reuse, and recyclability.                                      | 0.24   | 0.724  | -0.301 | -0.238 |
| 27. | Material passport                                 | The government and companies should ensure that all plastic products and packaging have a material passport with the full list of materials and their origin (including all the different polymers and additives) so recyclers know how to process them. | 0.391  | -2.029 | 0.387  | 0.049  |
| 28. | Restrict polymer types                            | The government should restrict the types of polymers and additives allowed in the market so there are only a handful of plastic streams that can be easily sorted and recycled.                                                                          | -0.574 | -1.243 | 0.876  | -1.903 |
| 29. | Product ecological footprint                      | The government and companies should ensure that all products contain a health, environment, and social footprint label (which                                                                                                                            | -1.163 | -0.616 | 0.485  | -1.046 |

|     |                                 |                                                                                                                                                                                                              |        |        |        |        |  |
|-----|---------------------------------|--------------------------------------------------------------------------------------------------------------------------------------------------------------------------------------------------------------|--------|--------|--------|--------|--|
|     |                                 | includes information about the packaging), so consumers have full information to make sustainable choices.                                                                                                   |        |        |        |        |  |
| 30. | Recycled content requirements   | The government should set high minimum requirements for recycled plastic content in new plastic products.                                                                                                    | 1.093  | -0.943 | 1.455  | 1.474  |  |
| 31. | Recycling bins                  | The government should provide more recycling bins and containers to people living in large cities, so they do not have to walk large distances to be able to recycle.                                        | -0.678 | 0.126  | -1.013 | 0.808  |  |
| 32. | Recycling targets               | The government should increase plastic recycling targets.                                                                                                                                                    | 0.636  | 0.39   | 1.48   | 1.426  |  |
| 33. | Less regulatory constraints     | The government should place less regulatory constraints for bio-based, biodegradable, and recycled plastics, especially for food uses.                                                                       | -1.669 | -0.787 | -1.024 | 1.333  |  |
| 34. | Renewable energy sources        | Companies should strive to use less energy as well as use only renewable energy sources to produce, transport, and recycle plastics.                                                                         | -0.555 | 0.192  | 0.06   | -1.236 |  |
| 35. | Restrict sales in Global South  | Companies should not sell non-biodegradable single-use plastic products in countries where the waste system cannot deal with plastic waste (such as in many countries in the Global South).                  | 0.814  | -0.647 | -1.268 | 0.954  |  |
| 36. | Promote reusable packaging      | The government and companies should highly increase the use of reusable packaging.                                                                                                                           | 2.101  | -0.967 | 0.538  | -0.905 |  |
| 37. | Short loops                     | Companies should keep plastic loops short and minimize transport costs by using local products and materials as well as local sorting, recycling, and production facilities.                                 | -2.101 | -0.545 | -0.651 | -1.095 |  |
| 38. | Employment and social inclusion | The government should help people working in unsustainable sectors of the plastic industry to relocate to the circular plastic economy and especially help the employment of people with poor job prospects. | -0.717 | 0.42   | -1.259 | -0.521 |  |
| 39. | Taxes on plastic                | The government should tax virgin fossil-based plastics and non-recyclable plastics and reduce the taxes on recycled plastics.                                                                                | 1.326  | 0.492  | 2.275  | 1.713  |  |

|     |                                                |                                                                                                                                                                                                                                         |        |        |        |        |
|-----|------------------------------------------------|-----------------------------------------------------------------------------------------------------------------------------------------------------------------------------------------------------------------------------------------|--------|--------|--------|--------|
| 40. | Transparenc<br>y on pledged<br>commitment<br>s | Companies should publicly disclose data on their use of plastics including information on plastic recycling and bioplastics, as well as data regarding the progress on the achievement of pledged commitments such as the Plastic Pact. | -0.362 | 0.241  | -0.25  | 0.667  |
| 41. | Unified<br>municipal<br>system                 | The government should establish a single system for waste management in all municipalities to generate efficient economies of scale for plastic recovery operations.                                                                    | 0.203  | 2.002  | 0.174  | 0.336  |
| 42. | Reduce<br>virgin-plastic<br>consumption        | The government should place targets to reduce overall plastic consumption per capita.                                                                                                                                                   | 0.648  | -1.583 | -1.362 | -1.382 |

---
